# Supplementary material for: SIRT1/Nrf2/NF-κB Signaling Mediates Anti-Inflammatory and Anti-Apoptotic Activities of Oleanolic Acid in a Mouse Model of Acute Hepatorenal Damage
Source: MDPI journal article supplement (doi:10.3390/medicina59071351), 2023-07-24
Supplement: s1 [file s1]

---

# Supporting Material

## SIRT1/Nrf2/NF- $\kappa$ B Signaling Mediates Anti-Inflammatory and Anti-Apoptotic Activities of Oleanolic Acid in a Mouse Model of Acute Hepatorenal Damage

Manea A. I. Alqrad <sup>1</sup>, Dina S. El-Agamy <sup>2</sup>, Sabrin R. M. Ibrahim <sup>3,4</sup>, Alaa Sirwi <sup>1</sup>,  
Hossam M. Abdallah <sup>1</sup>, Essam Abdel-Sattar <sup>5</sup>, Ali M. El-Halawany <sup>5</sup>, Wael M. Elsaed <sup>6</sup>  
and Gamal A. Mohamed <sup>1,\*</sup>

<sup>1</sup> Department of Natural Products and Alternative Medicine, Faculty of Pharmacy,  
King Abdulaziz University, Jeddah 21589, Saudi Arabia;  
mibrahimalqrad@stu.kau.edu.sa (M.A.I.A.); asirwi@kau.edu.sa (A.S.);  
hmafifi@kau.edu.sa (H.M.A.)

<sup>2</sup> Department of Pharmacology and Toxicology, Faculty of Pharmacy,  
Mansoura University, Mansoura 35516, Egypt; dinaagamy@mans.edu.eg

<sup>3</sup> Department of Chemistry, Preparatory Year Program, Batterjee Medical College,  
Jeddah 21442, Saudi Arabia; sabrin.ibrahim@bmc.edu.sa

<sup>4</sup> Department of Pharmacognosy, Faculty of Pharmacy, Assiut University,  
Assiut 71526, Egypt

<sup>5</sup> Department of Pharmacognosy, Faculty of Pharmacy, Cairo University,  
Giza 12613, Egypt; essam.abdelsattar@pharma.cu.edu.eg (E.A.-S.);  
ali.elhalawany@pharma.cu.edu.eg (A.M.E.-H.)

<sup>6</sup> Department of Anatomy and Embryology, Faculty of Medicine, Mansoura University,  
Mansoura 35516, Egypt; wzaarina@mans.edu.eg

\* Correspondence: gahussein@kau.edu.sa; Tel.: +966-59-763-6182

Dr. Hossam  
Sample VS-2-1 CDCl<sub>3</sub>

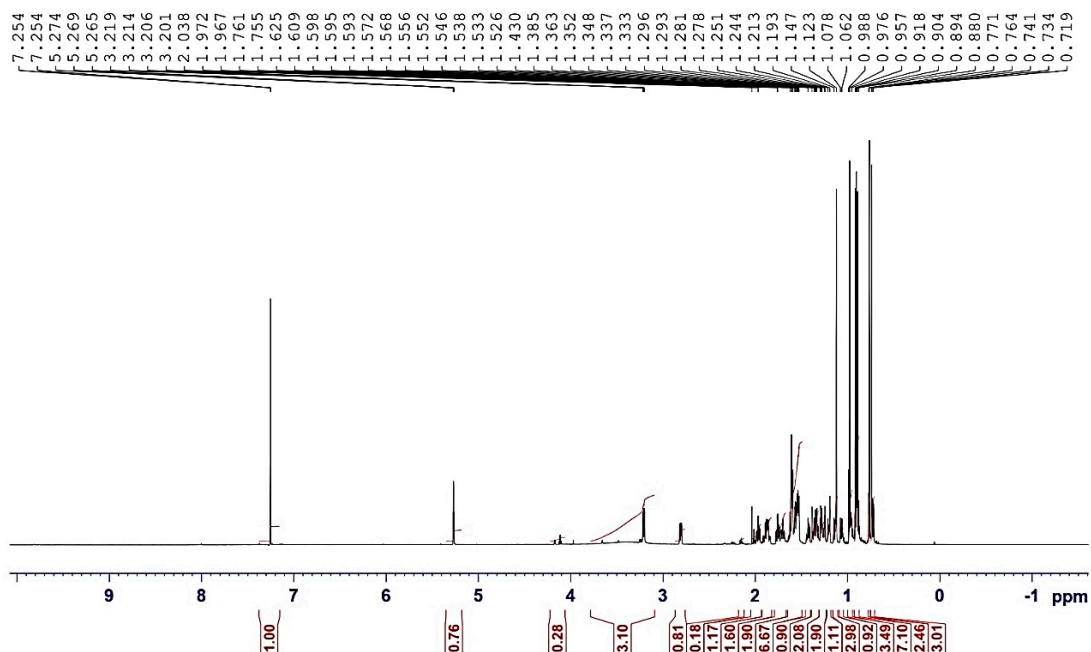

**Figure S1:** <sup>1</sup>H NMR spectrum of oleanolic acid (CDCl<sub>3</sub>, 850 MHz).

Dr. Hossam  
Sample VS-2-1 CDCl<sub>3</sub>

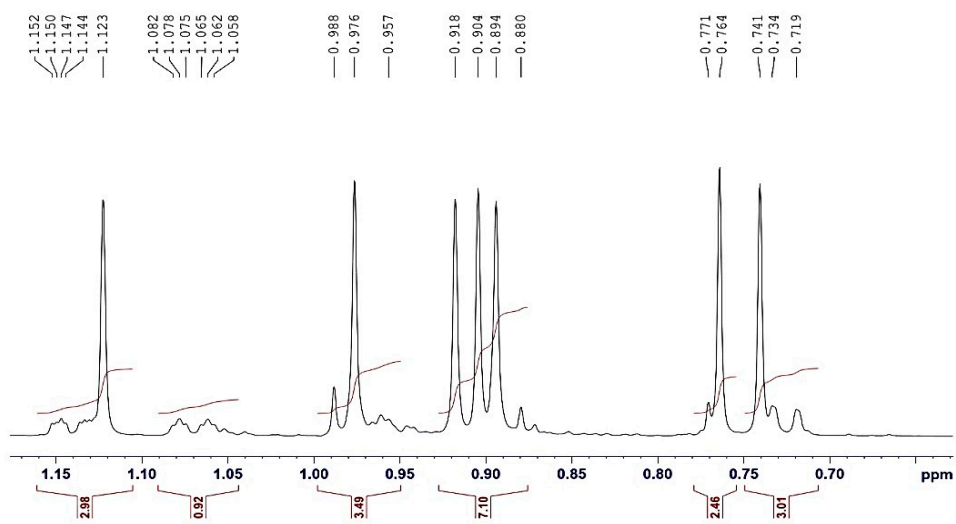

**Figure S2:** Expansion of <sup>1</sup>H NMR spectrum of oleanolic acid (CDCl<sub>3</sub>, 850 MHz).

Dr. Hossam  
Sample VS-2-1 CDCL<sub>3</sub>

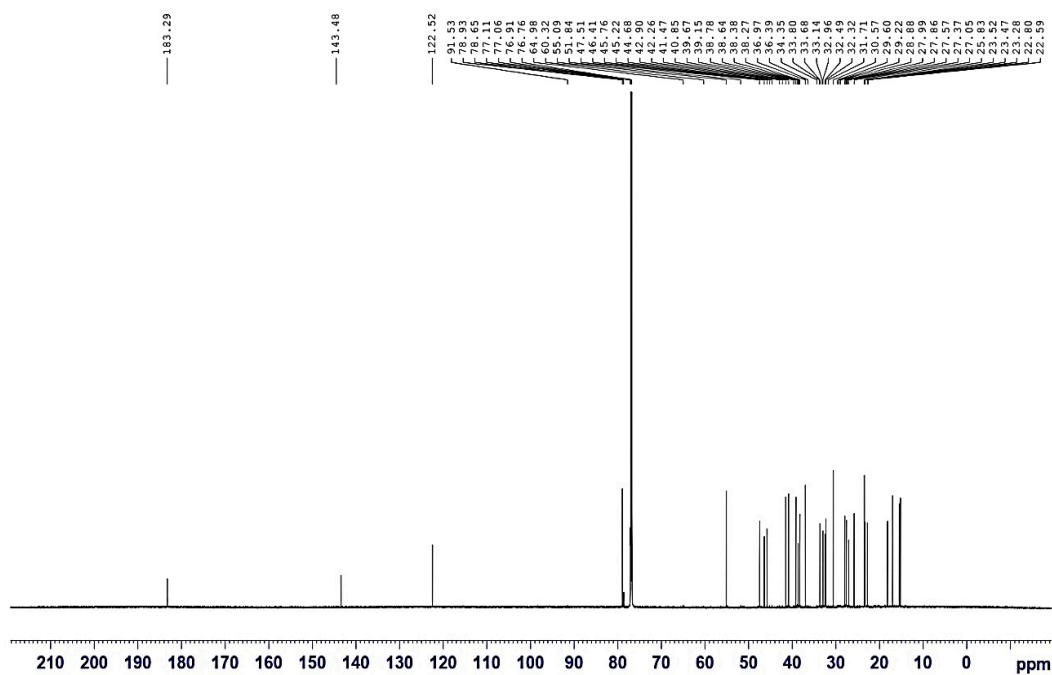

**Figure S3:** <sup>13</sup>C NMR spectrum of oleanolic acid (CDCl<sub>3</sub>, 214 MHz).

Dr. Hossam  
Sample VS-2-1 CDCL<sub>3</sub>

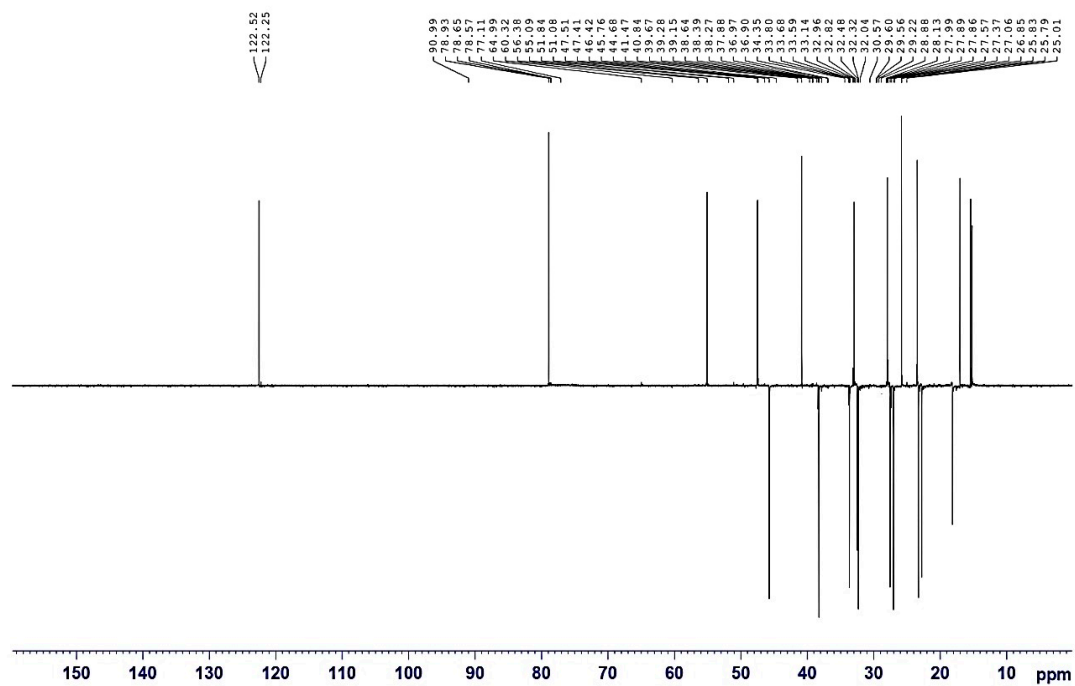

**Figure S4:** DEPT <sup>13</sup>C NMR spectrum of oleanolic acid (CDCl<sub>3</sub>, 214 MHz).

**Table S1.** NMR spectral data of oleanolic acid (CDCl<sub>3</sub>, 850 and 214 MHz).

| No. | $\delta_H$ (m, J in Hz) | $\delta_C$           |
|-----|-------------------------|----------------------|
| 1   | 1.52 m                  | 39.2 CH <sub>2</sub> |
|     | 1.08 m                  |                      |
| 2   | 1.72 m                  | 27.1 CH <sub>2</sub> |
|     | 1.54 m                  |                      |
| 3   | 3.23 dd (11.2, 4.8)     | 78.9 CH              |
| 4   | -                       | 38.2 C               |
| 5   | 0.72 m                  | 55.1 CH              |
| 6   | 1.42 m                  | 18.2 CH <sub>2</sub> |
|     | 1.27 m                  |                      |
| 7   | 1.48 m                  | 32.5 CH <sub>2</sub> |
|     | 1.32 m                  |                      |
| 8   | -                       | 38.6 C               |
| 9   | 1.53 m                  | 47.5 CH              |
| 10  | -                       | 37.0 C               |
| 11  | 1.91 m                  | 23.3 CH <sub>2</sub> |
|     | 1.86 m                  |                      |
| 12  | 5.27 t (3.4)            | 122.5 CH             |
| 13  | -                       | 143.4 C              |
| 14  | -                       | 40.9 C               |
| 15  | 1.78 m                  | 27.6 CH <sub>2</sub> |
|     | 1.20 m                  |                      |
| 16  | 1.98 m                  | 22.6 CH <sub>2</sub> |
|     | 1.62 m                  |                      |
| 17  | -                       | 46.4 C               |
| 18  | 2.81 dd (13.6, 4.3)     | 41.5 CH              |
| 19  | 1.60 m                  | 45.8 CH <sub>2</sub> |
|     | 1.15 m                  |                      |
| 20  | -                       | 30.6 C               |
| 21  | 1.42 m                  | 34.4 CH <sub>2</sub> |
|     | 1.28 m                  |                      |
| 22  | 1.79 m                  | 32.3 CH <sub>2</sub> |
|     | 1.58 m                  |                      |
| 23  | 0.98 s                  | 28.0 CH <sub>3</sub> |
| 24  | 0.76 s                  | 15.4 CH <sub>3</sub> |
| 25  | 0.89 s                  | 15.2 CH <sub>3</sub> |
| 26  | 0.74 s                  | 17.0 CH <sub>3</sub> |
| 27  | 1.12 s                  | 25.8 CH <sub>3</sub> |
| 28  | -                       | 183.3 C              |
| 29  | 0.90 s                  | 33.0 CH <sub>3</sub> |
| 30  | 0.92 s                  | 23.4 CH <sub>3</sub> |

Data File C:\CHEM32\1\DATA\SAMEH20222023\NOHA000488.D  
Sample Name: Sample Dr Gamal

```
=====
Acq. Operator   : SAMEH-NOHA                      Location : Vial 93
Acq. Instrument : Instrument 1
Injection Date  : 5/21/2023 3:09:25 PM             Inj Volume : 1.0 µl

Acq. Method     : C:\CHEM32\1\METHODS\SAMEH-2022-23.M
Last changed    : 5/21/2023 3:07:54 PM by SAMEH-NOHA
                  (modified after loading)
Analysis Method : C:\CHEM32\1\METHODS\SAMEH-2022-23.M
Last changed    : 5/21/2023 3:18:17 PM by SAMEH-NOHA
                  (modified after loading)
Sample Info     : 50 % ACN
                  1 mL/Min
                  Zorbax 250x4.6 mm
=====
```

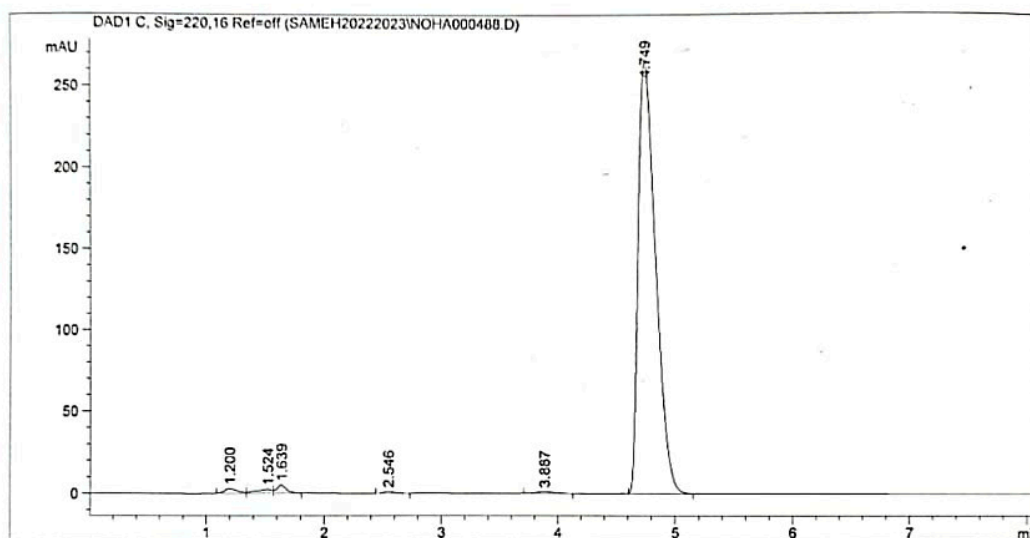

Area Percent Report

```
=====
Sorted By      :      Signal
Multiplier:    :      1.0000
Dilution:      :      1.0000
Use Multiplier & Dilution Factor with ISTDs
=====
```

Signal 1: DAD1 C, Sig=220,16 Ref=off

| Peak # | RetTime [min] | Type | Width [min] | Area [mAU*s] | Height [mAU] | Area % |
|--------|---------------|------|-------------|--------------|--------------|--------|
| 1      | 1.200         | BV   | 0.1152      | 21.80693     | 2.91725      | 0.7729 |
| 2      | 1.524         | VV   | 0.1238      | 21.22238     | 2.33968      | 0.7522 |
| 3      | 1.639         | VB   | 0.0832      | 27.66283     | 4.94669      | 0.9805 |

Instrument 1 5/21/2023 3:18:38 PM SAMEH-NOHA

Page 1 of 2

Data File C:\CHEM32\1\DATA\SAMEH20222023\NOHA000400.D  
Sample Name: Sample Dr Gamal

| Peak<br># | RetTime<br>[min] | Type | Width<br>[min] | Area<br>[mAU*s] | Height<br>[mAU] | Area<br>% |
|-----------|------------------|------|----------------|-----------------|-----------------|-----------|
| 4         | 2.546            | BB   | 0.0950         | 6.55862         | 1.04888         | 0.2325    |
| 5         | 3.887            | BB   | 0.1592         | 11.08350        | 1.03271         | 0.3929    |
| 6         | 4.749            | BB   | 0.1621         | 2732.97021      | 265.38626       | 96.8690   |

Totals : 2021.30448 277.67147

\*\*\* End of Report \*\*\*

**Figure S5:** HPLC chromatogram of oleanolic acid.
